# Supplementary material for: Magnetic–fluorescent nanocomposites as reusable fluorescence probes for sensitive detection of hydrogen peroxide and glucose
Source: Royal Society of Chemistry journal article supplement (doi:10.1039/c4ay00886c), 2014-01-01
Supplement: c4ay00886c1.pdf [file c4ay00886c1.pdf]

## Electronic Supplementary Information

### Magnetic–fluorescent nanocomposites as reusable fluorescence probes for sensitive detection of hydrogen peroxide and glucose

Hao Zheng,<sup>a</sup> Rongxin Su,<sup>\*a,b</sup> Zhao Gao,<sup>a</sup> Wei Qi,<sup>a,b</sup> Renliang Huang,<sup>c</sup> Libing Wang,<sup>a</sup> and Zhimin He<sup>a</sup>

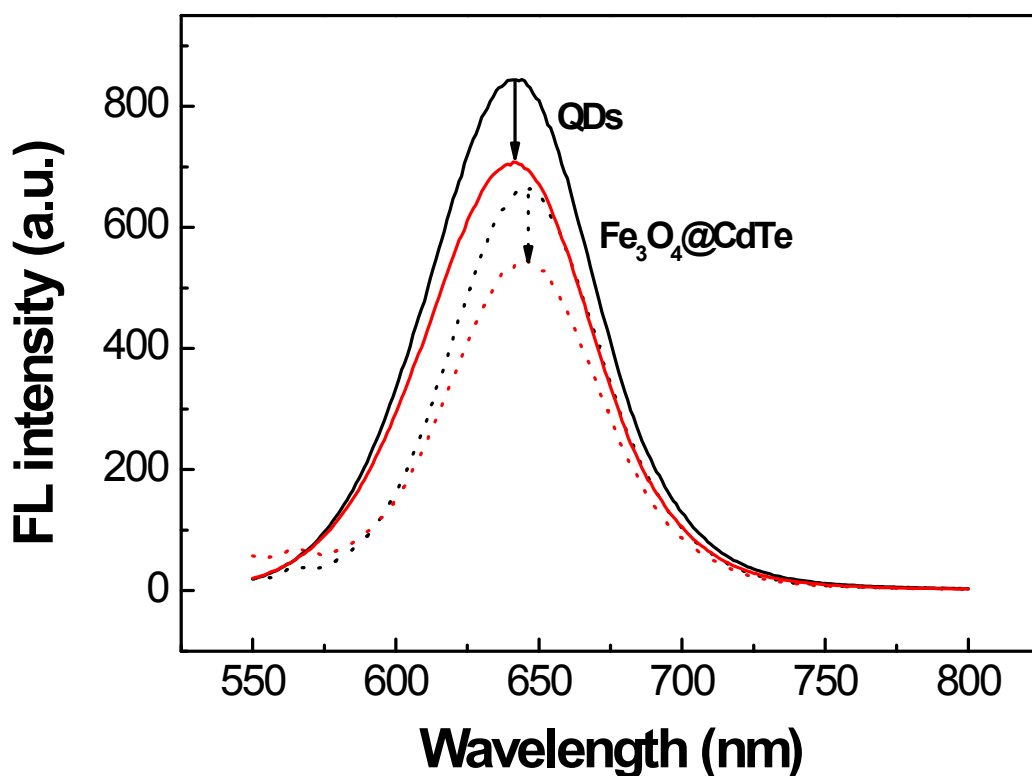

**Figure S1** Fluorescence quenching of  $\text{Fe}_3\text{O}_4$  nanocomposites and CdTe QDs by 3mM glucose

Figure S1 reveals that the same degrees of fluorescence quenching of  $\text{Fe}_3\text{O}_4$  nanocomposites and CdTe QDs by the glucose with the concentration of 3mM. Compared with individual component (CdTe QDs),  $\text{Fe}_3\text{O}_4$  nanocomposites maintained the excellent fluorescence property. Therefore,  $\text{Fe}_3\text{O}_4$  nanocomposites can be also used as a fluorescence probe to detect glucose.

<sup>a</sup> State Key Laboratory of Chemical Engineering, Tianjin Key Laboratory of Membrane Science and Desalination Technology, School of Chemical Engineering and Technology, Tianjin University, Tianjin 300072, P. R. China. Fax: (86)022-27407599; Tel: (86)022-27407599; E-mail: surx@tju.edu.cn

<sup>b</sup> Collaborative Innovation Center of Chemical Science and Engineering (Tianjin), Tianjin 300072, China

<sup>c</sup> School of Environmental Science and Engineering, Tianjin University, Tianjin 300072, PR China
